# Supplementary material
Source: PubMed Central journal article supplement (PMC539719)

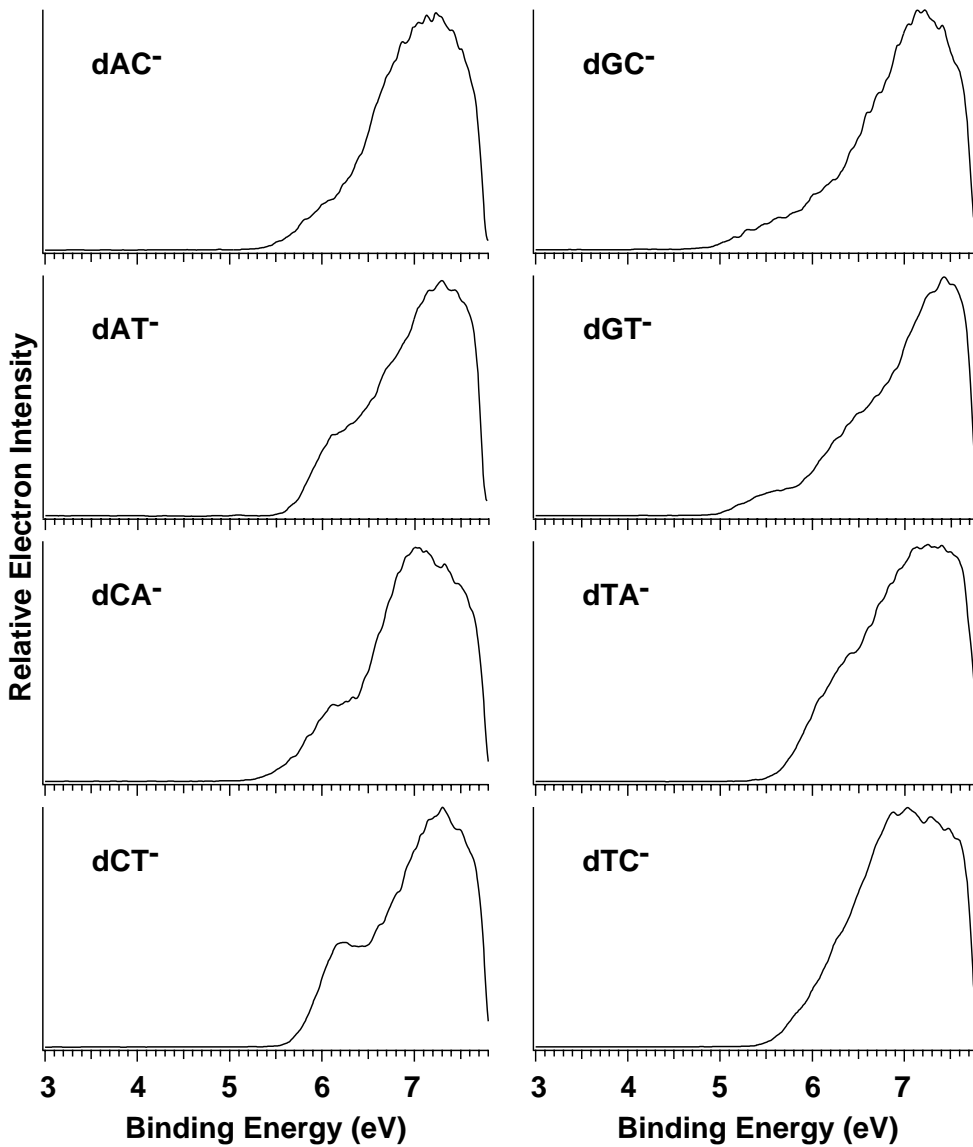

Supplement: pnas_101_51_17588__1.pdf [file pnas_101_51_17588__1.pdf]
